# Supplementary material
Source: PubMed Central journal article supplement (PMC3083120)
Supplement: NIHMS255854-supplement-1_si_001.pdf [file NIHMS255854-supplement-1_si_001.pdf]

**Supporting information for:**

**Drug-loaded, bivalent-bottle-brush polymers by graft-through ROMP**

Jeremiah A. Johnson, Ying Y. Lu, Alan O. Burts, Alec C. Durrell, Yan Xia, David A. Tirrell, Robert H. Grubbs

*Division of Chemistry and Chemical Engineering, California Institute of Technology, 1200 E. California Blvd., Pasadena,  
California 91125*



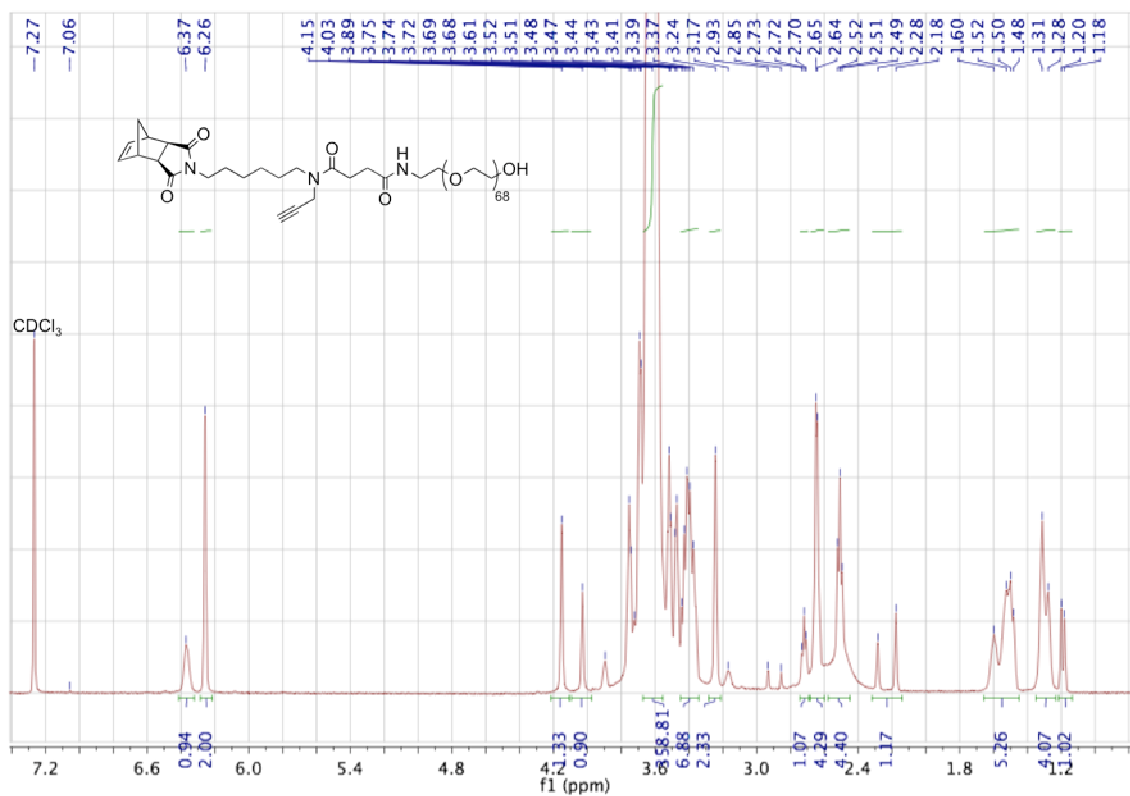

**Figure S2.** 500 MHz  $^1\text{H}$  NMR spectrum of **7** in  $\text{CDCl}_3$ .

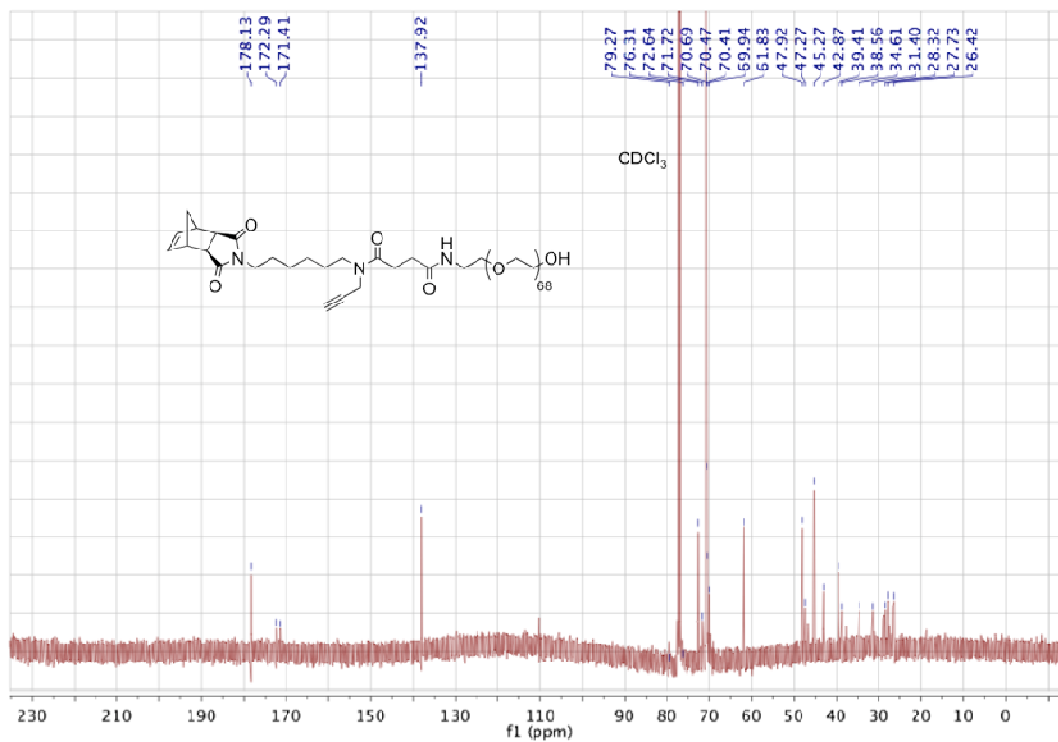

**Figure S3.** 500 MHz  $^{13}\text{C}$  NMR spectrum of **7** in  $\text{CDCl}_3$ .

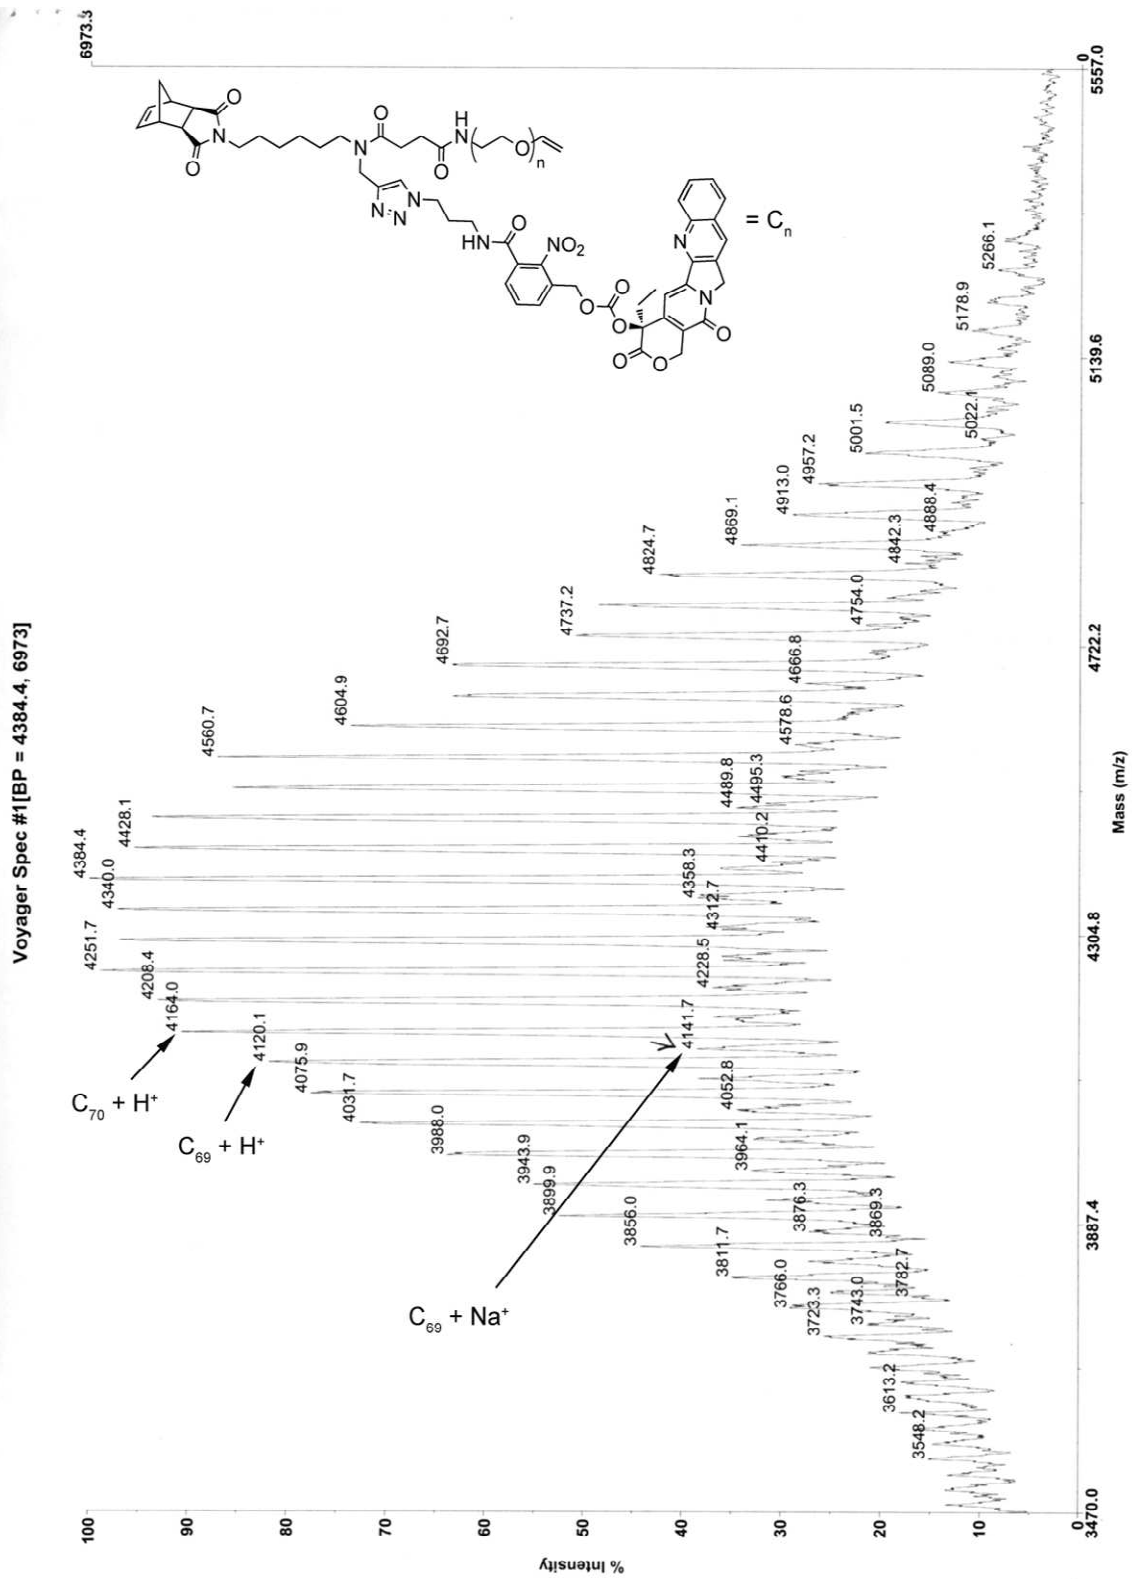

Figure S4. MALDI spectrum of CT-MM

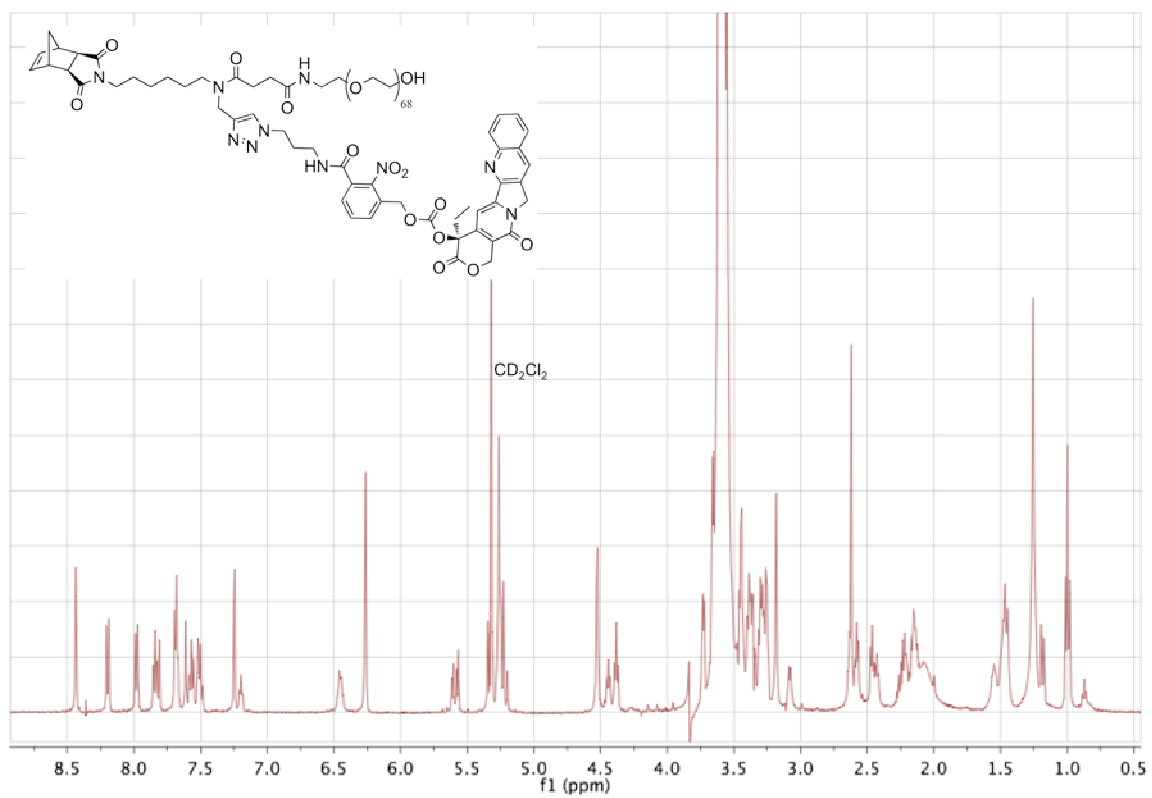

**Figure S5.** 500 MHz  $^1H$  NMR spectrum of **CT-MM** in  $CD_2Cl_2$ .

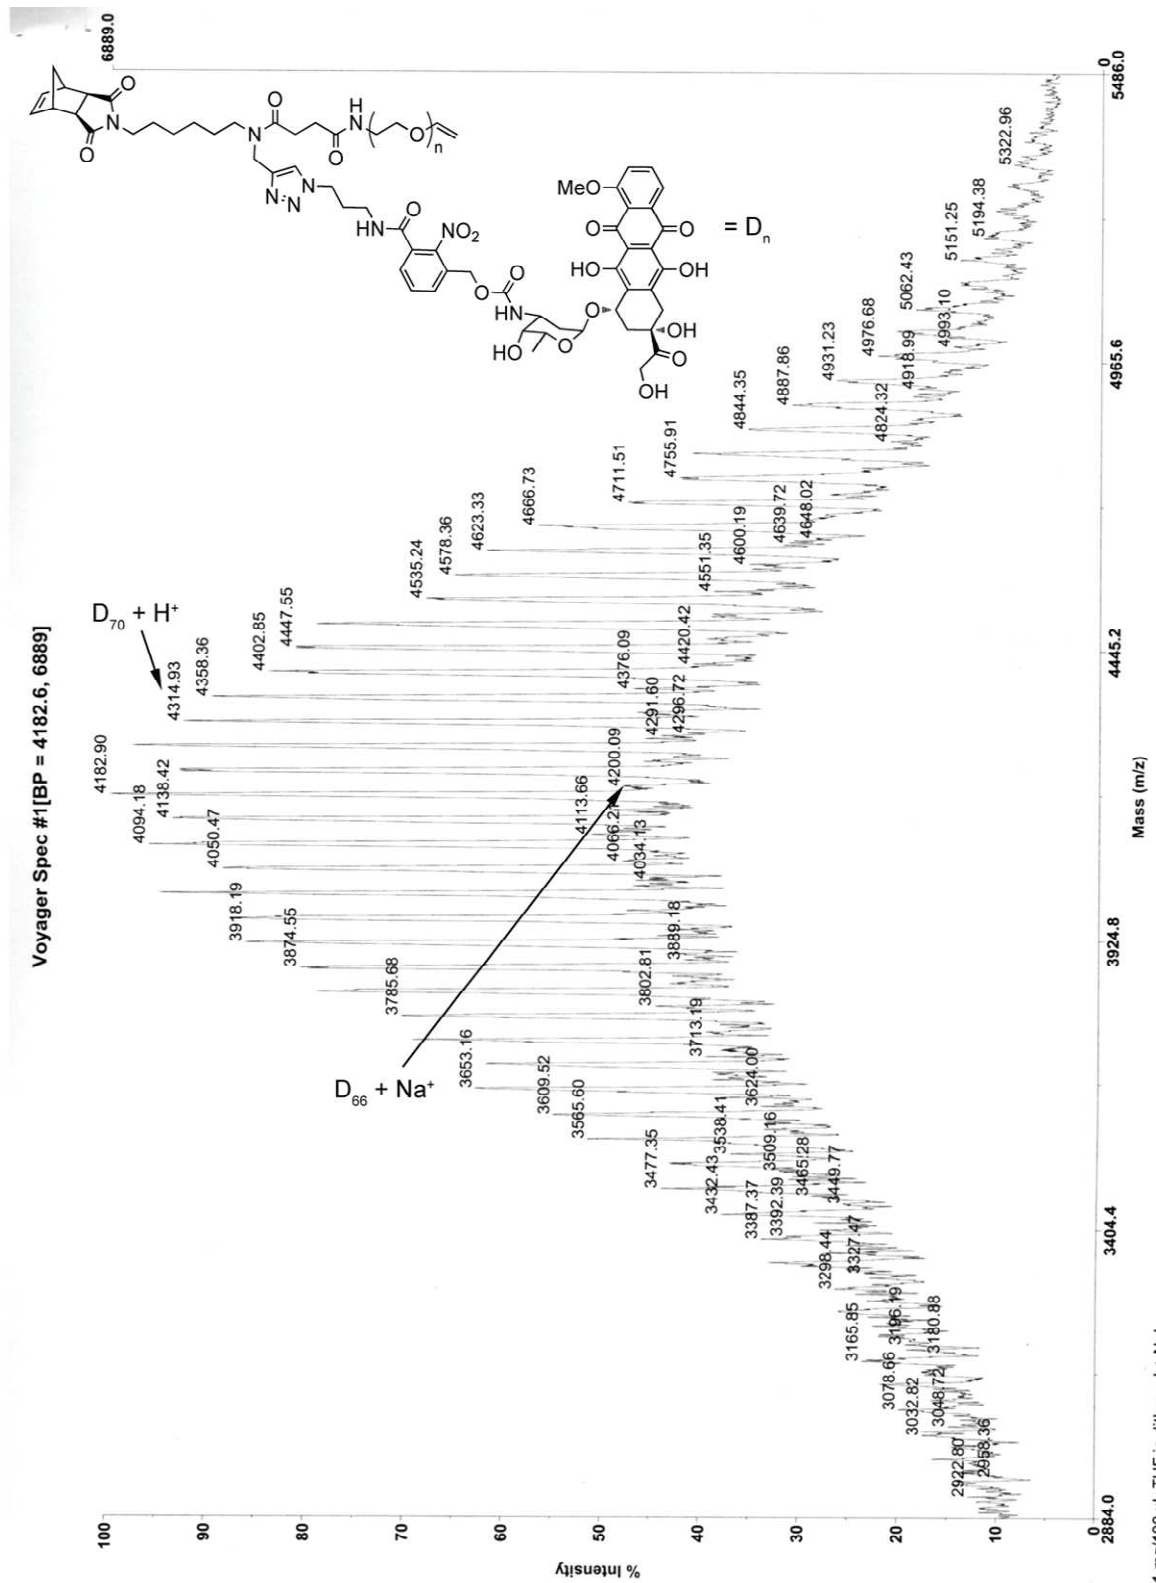

Figure S6. MALDI spectrum of DOX-MM

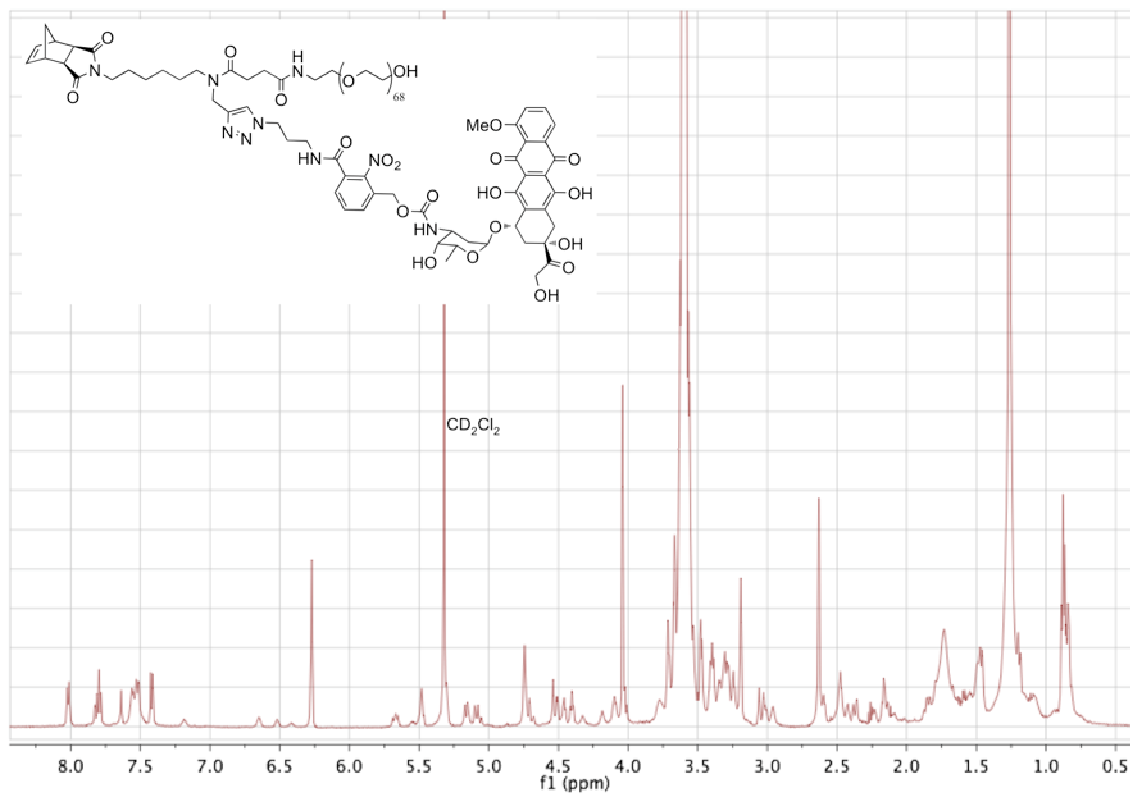

**Figure S7.** 500 MHz <sup>1</sup>H NMR spectrum of **DOX-MM** in CD<sub>2</sub>Cl<sub>2</sub>.

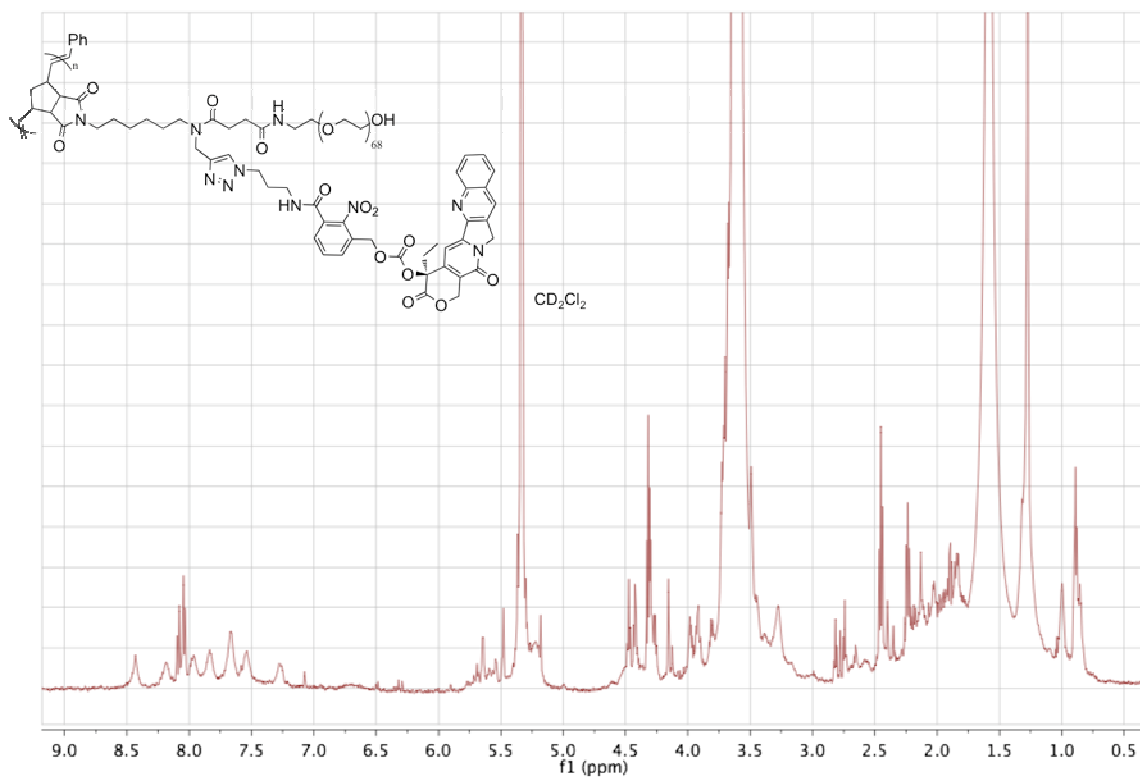

**Figure S8.** 600 MHz <sup>1</sup>H NMR spectrum of pCT in CD<sub>2</sub>Cl<sub>2</sub> immediately after ROMP.

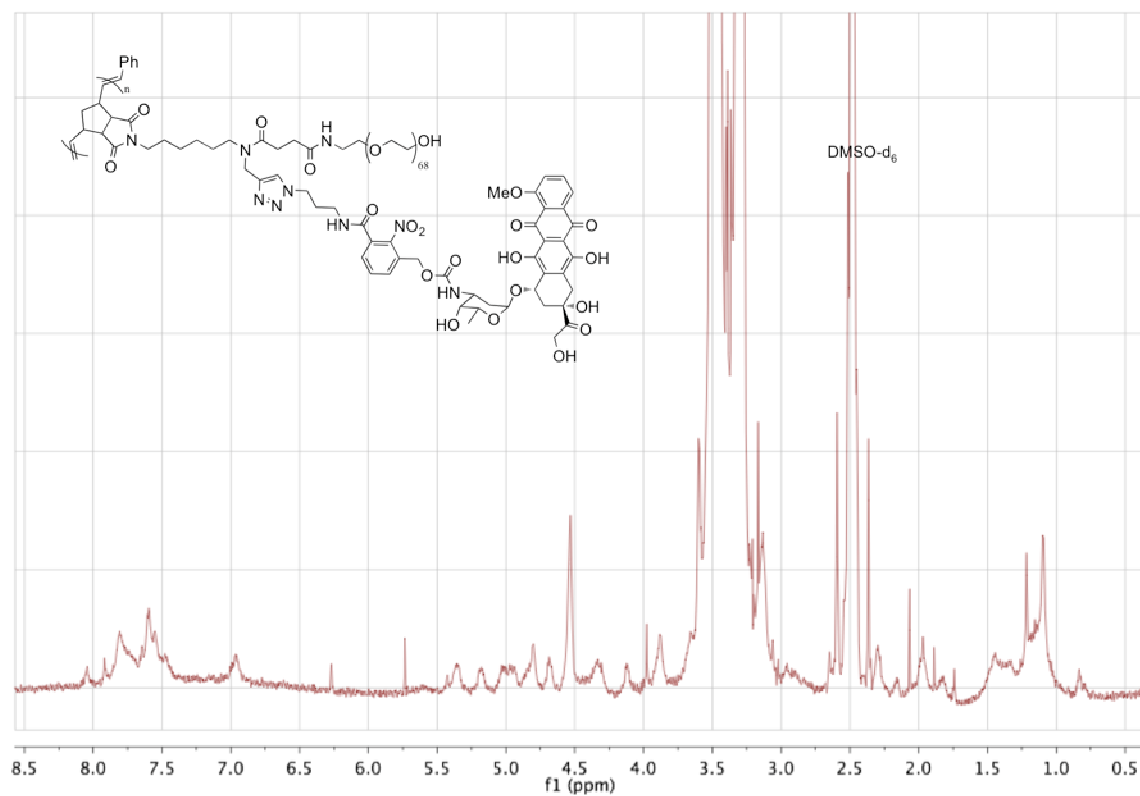



**Figure S9.** 600 MHz  $^1\text{H}$  NMR spectrum of **pDOX03** in  $\text{DMSO-d}_6$  immediately after ROMP.

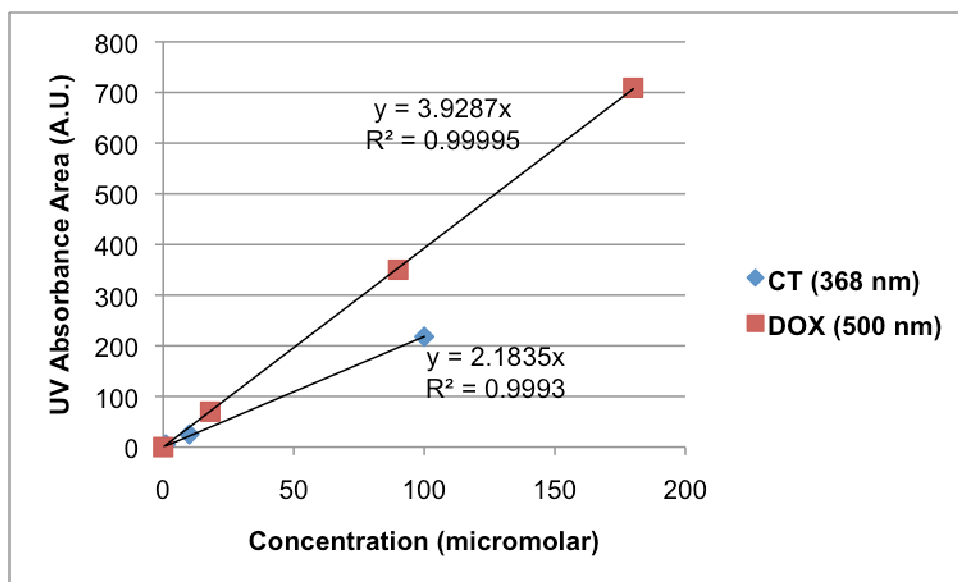

**Figure S10.** LC calibration curves for **DOX** and **CT**.
